# Supplementary material
Source: MDPI journal article supplement (https://www.mdpi.com/2073-4344/8/4/133)
Supplement: s1 [file s1]

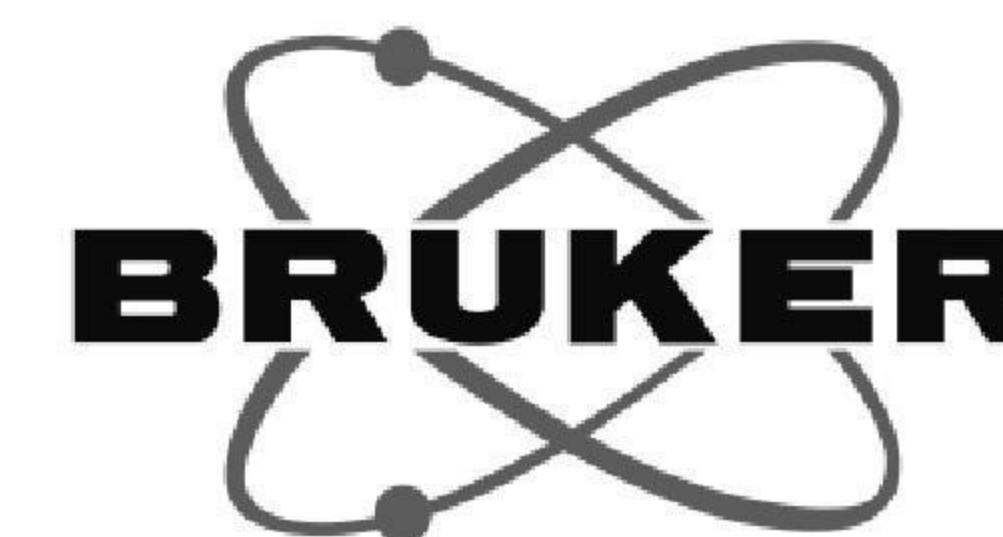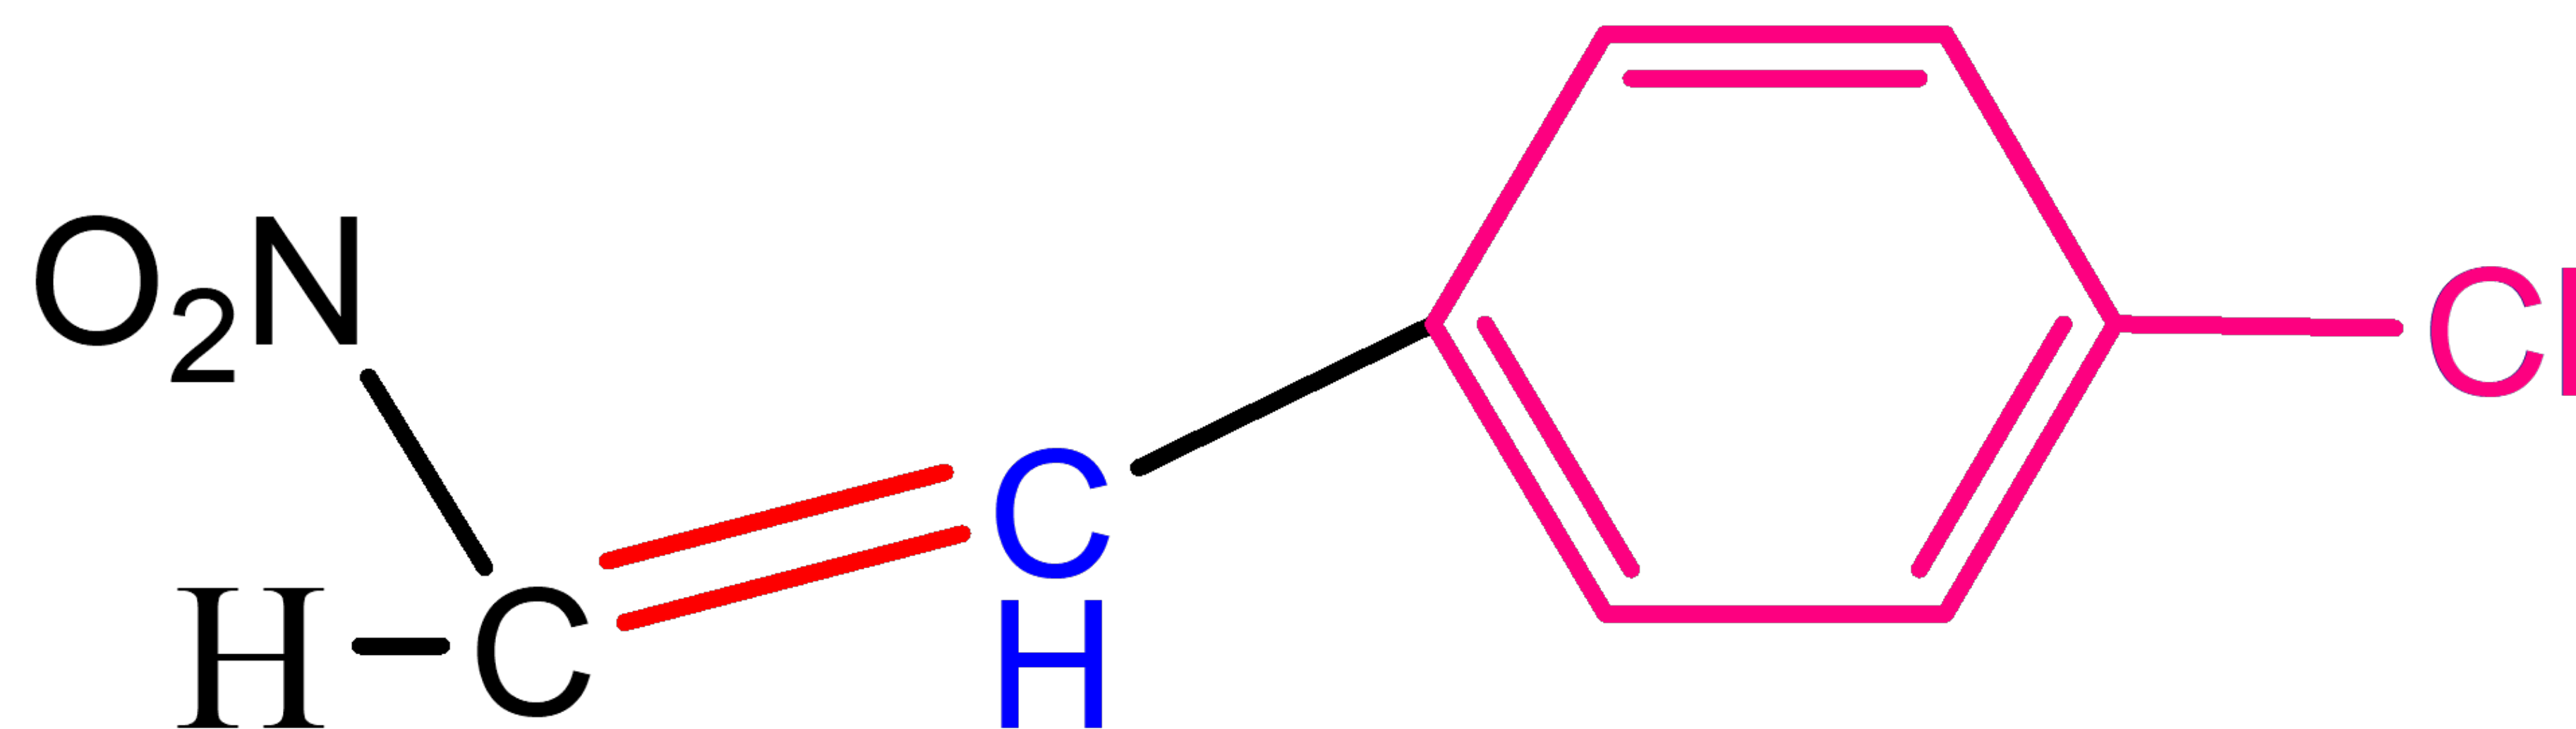

Current Data Parameters

NAME MAJDA A  
EXPNO 50  
PROCNO 1

F2 - Acquisition Parameters

Date\_   
Time 10.14  
INSTRUM spect  
PROBHD 5 mm CPQCI 1H-  
PULPROG zg30  
TD 65536  
SOLVENT DMSO  
NS 32  
DS 2  
SWH 17006.803 Hz  
FIDRES 0.259503 Hz  
AQ 1.9267584 sec  
RG 10.55  
DW 29.400 usec  
DE 10.00 usec  
TE 298.0 K  
D1 1.00000000 sec  
TD0 1

===== CHANNEL f1 =====

SFO1 850.1552500 MHz  
NUC1 1H  
P1 8.00 usec  
PLW1 15.30000019 W

F2 - Processing parameters

SI 65536  
SF 850.1500000 MHz  
WDW EM  
SSB 0  
LB 0.30 Hz  
GB 0  
PC 2.00

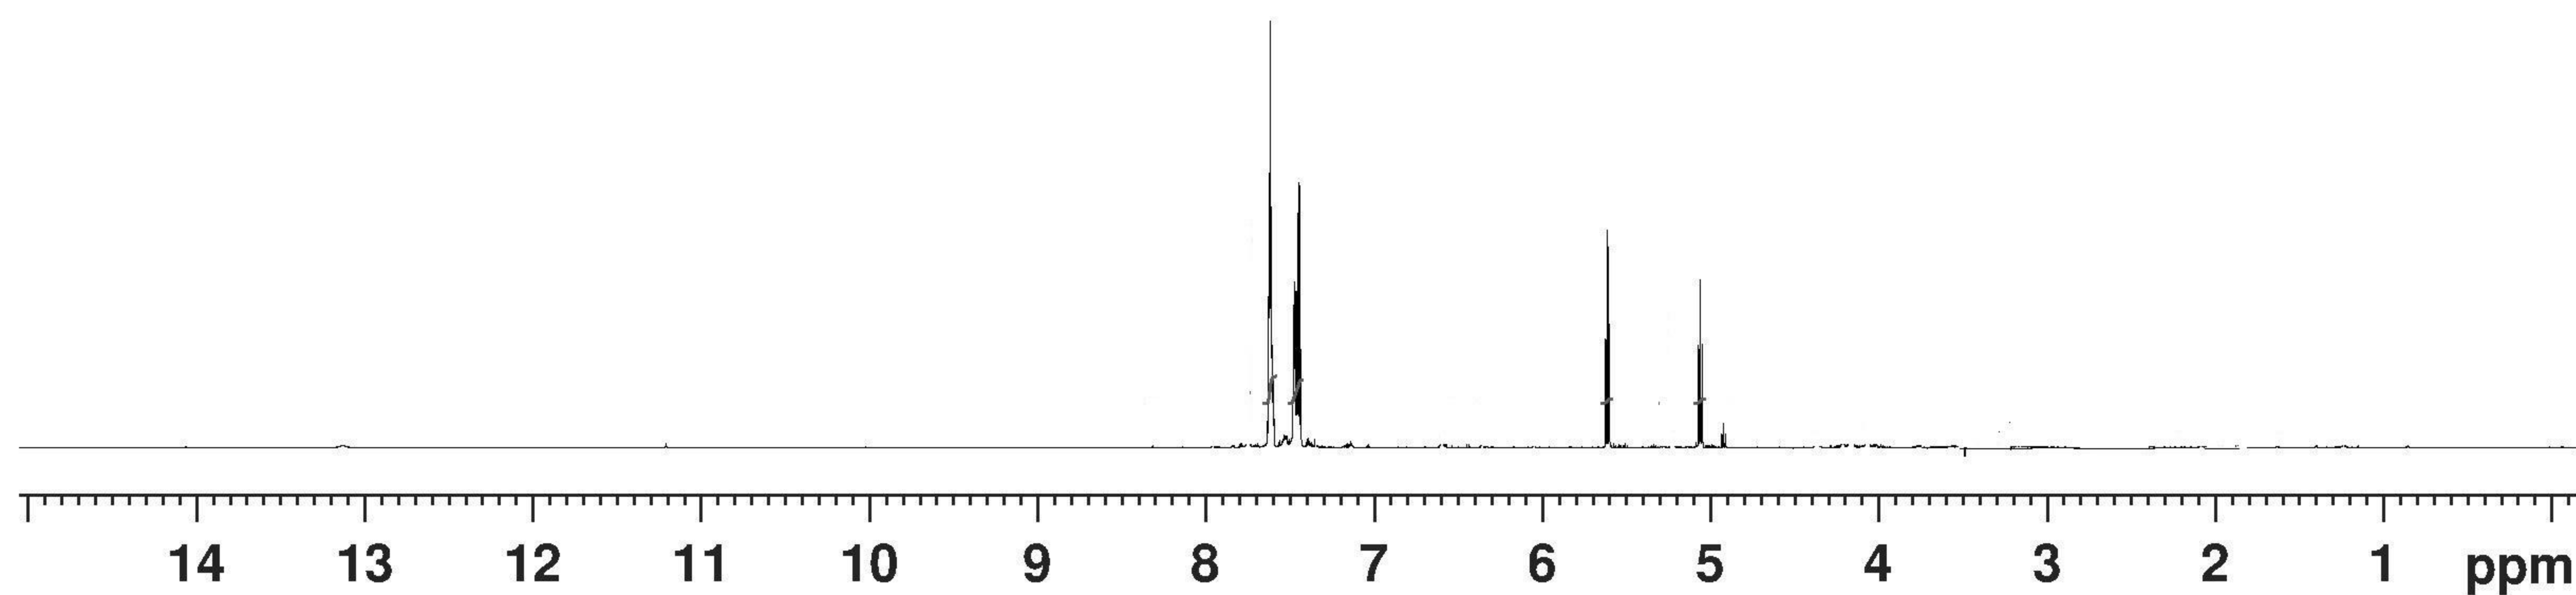

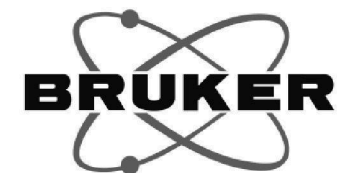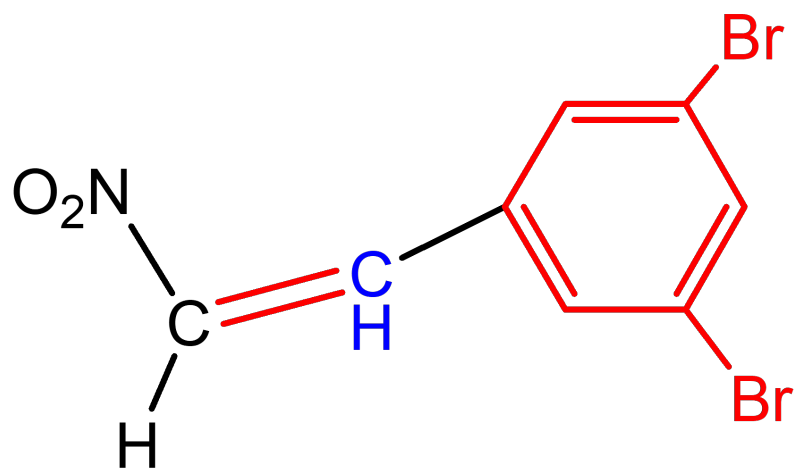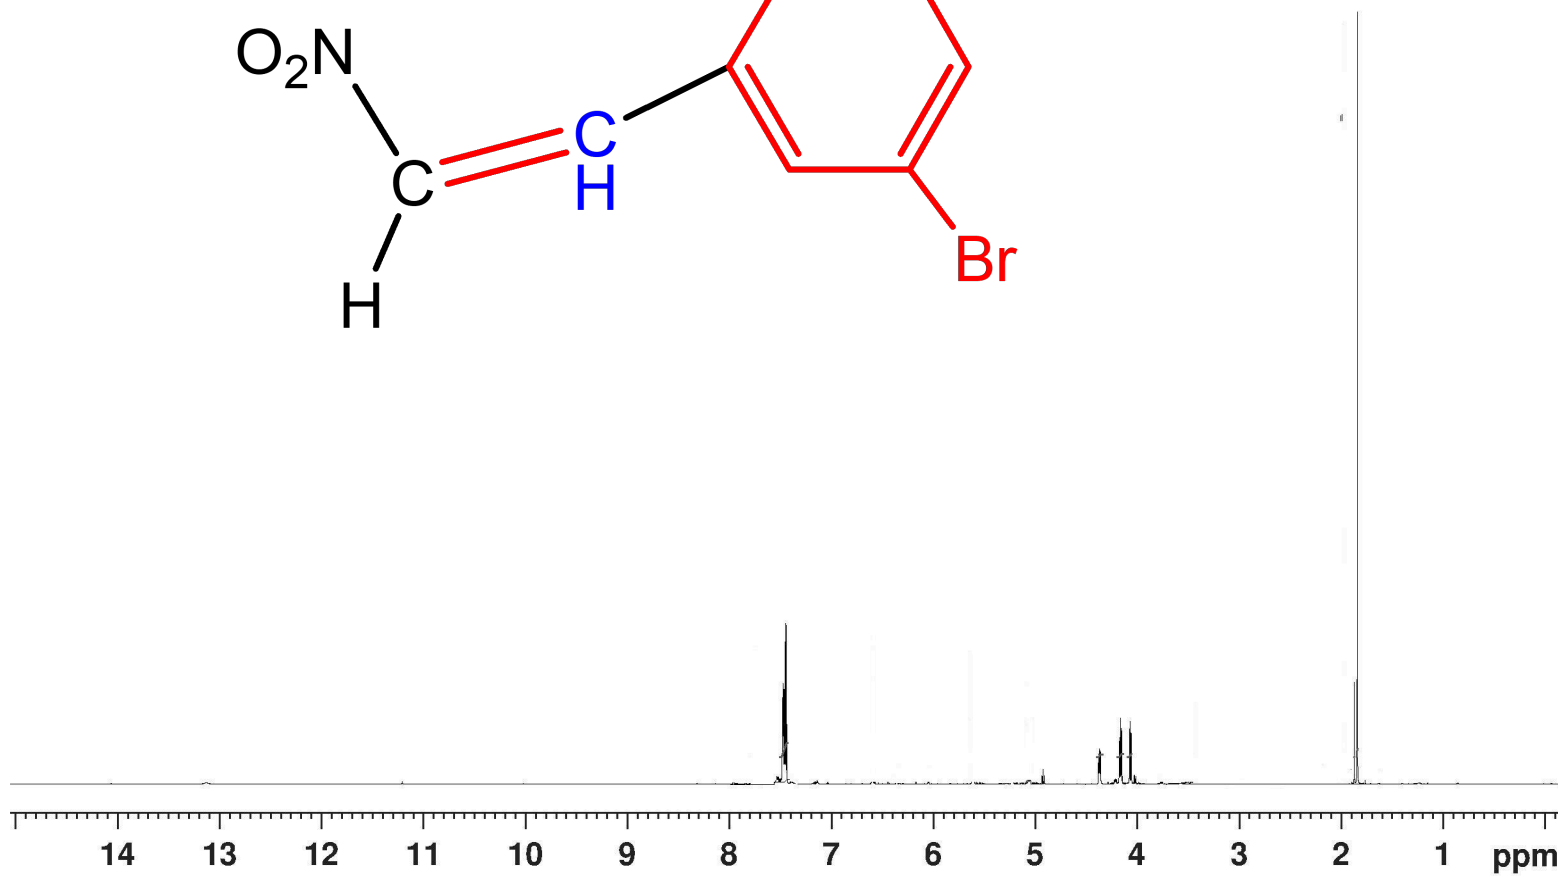

Current Data Parameters

NAME MAJDA B  
EXPNO 50  
PROCNO 1

F2 - Acquisition Parameters

Date\_ 10.14  
Time spect  
INSTRUM 5 mm CPQCI 1H-  
PROBHD zg30  
PULPROG 65536  
TD DMSO  
SOLVENT 32  
NS 2  
DS 17006.803 Hz  
SWH 0.259503 Hz  
FIDRES 1.9267584 sec  
AQ 10.55  
RG 29.400 usec  
DW 10.00 usec  
DE 298.0 K  
TE 1.0000000 sec  
D1 1  
TD0

===== CHANNEL f1 =====  
SFO1 850.1552500 MHz  
NUC1 1H  
P1 8.00 usec  
PLW1 15.30000019 W

F2 - Processing parameters  
SI 65536  
SF 850.1500000 MHz  
WDW EM  
SSB 0  
LB 0.30 Hz  
GB 0  
PC 2.00

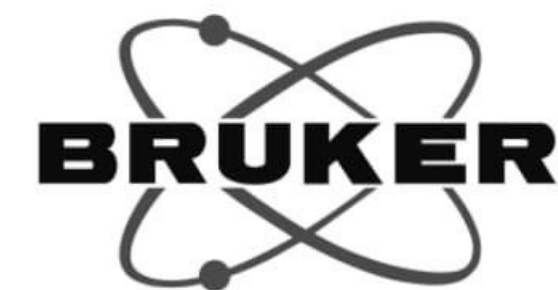

Current Data Parameters  
NAME MAJDA C  
EXPNO 50  
PROCNO 1

F2 - Acquisition Parameters  
Date\_ 20160126  
Time 10.14  
INSTRUM spect  
PROBHD 5 mm CPQCI 1H-  
PULPROG zg30  
TD 65536  
SOLVENT DMSO  
NS 32  
DS 2  
SWH 17006.803 Hz  
FIDRES 0.259503 Hz  
AQ 1.9267584 sec  
RG 10.55  
DW 29.400 usec  
DE 10.00 usec  
TE 298.0 K  
D1 1.00000000 sec  
TD0 1

===== CHANNEL f1 =====  
SFO1 850.1552500 MHz  
NUC1 1H  
P1 8.00 usec  
PLW1 15.30000019 W

F2 - Processing parameters  
SI 65536  
SF 850.1500000 MHz  
WDW EM  
SSB 0  
LB 0.30 Hz  
GB 0  
PC 2.00

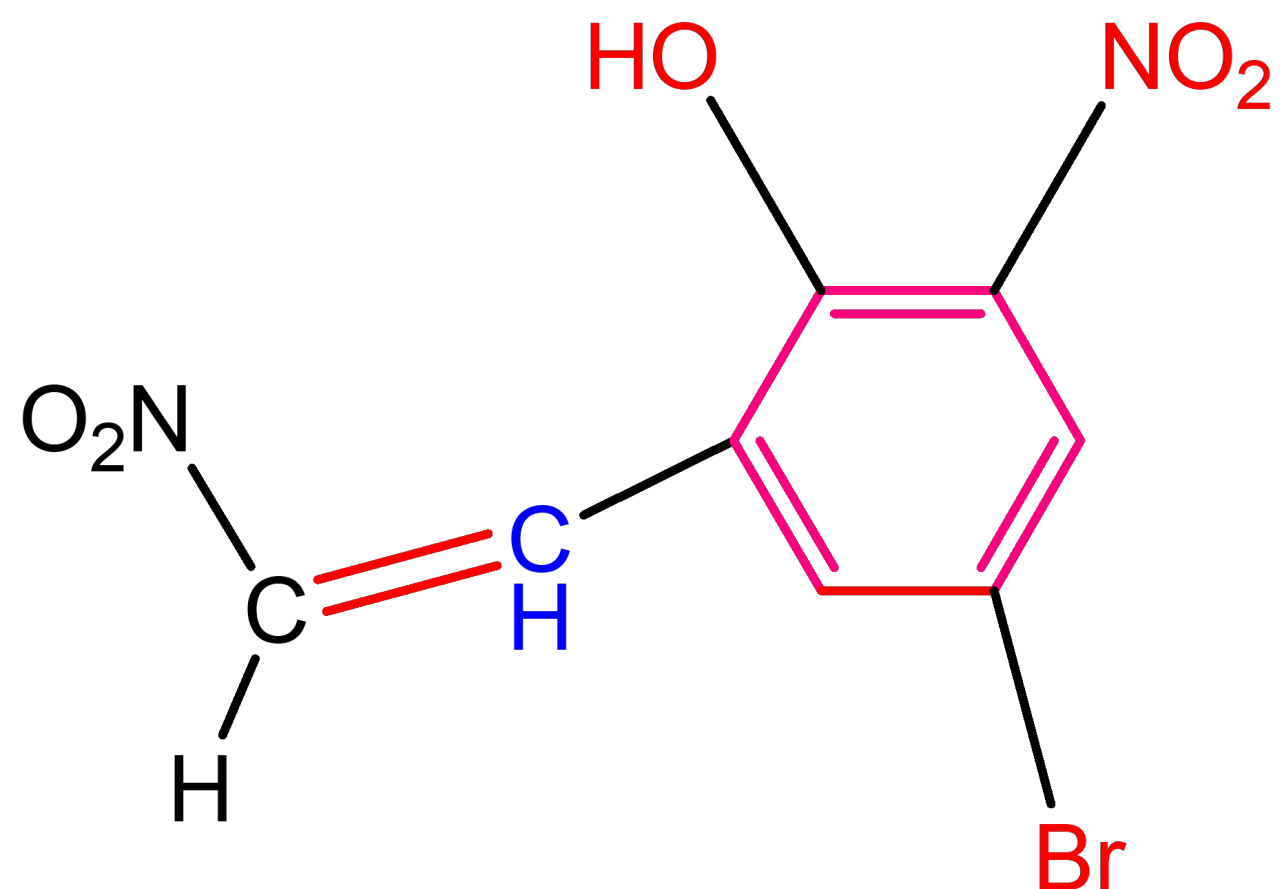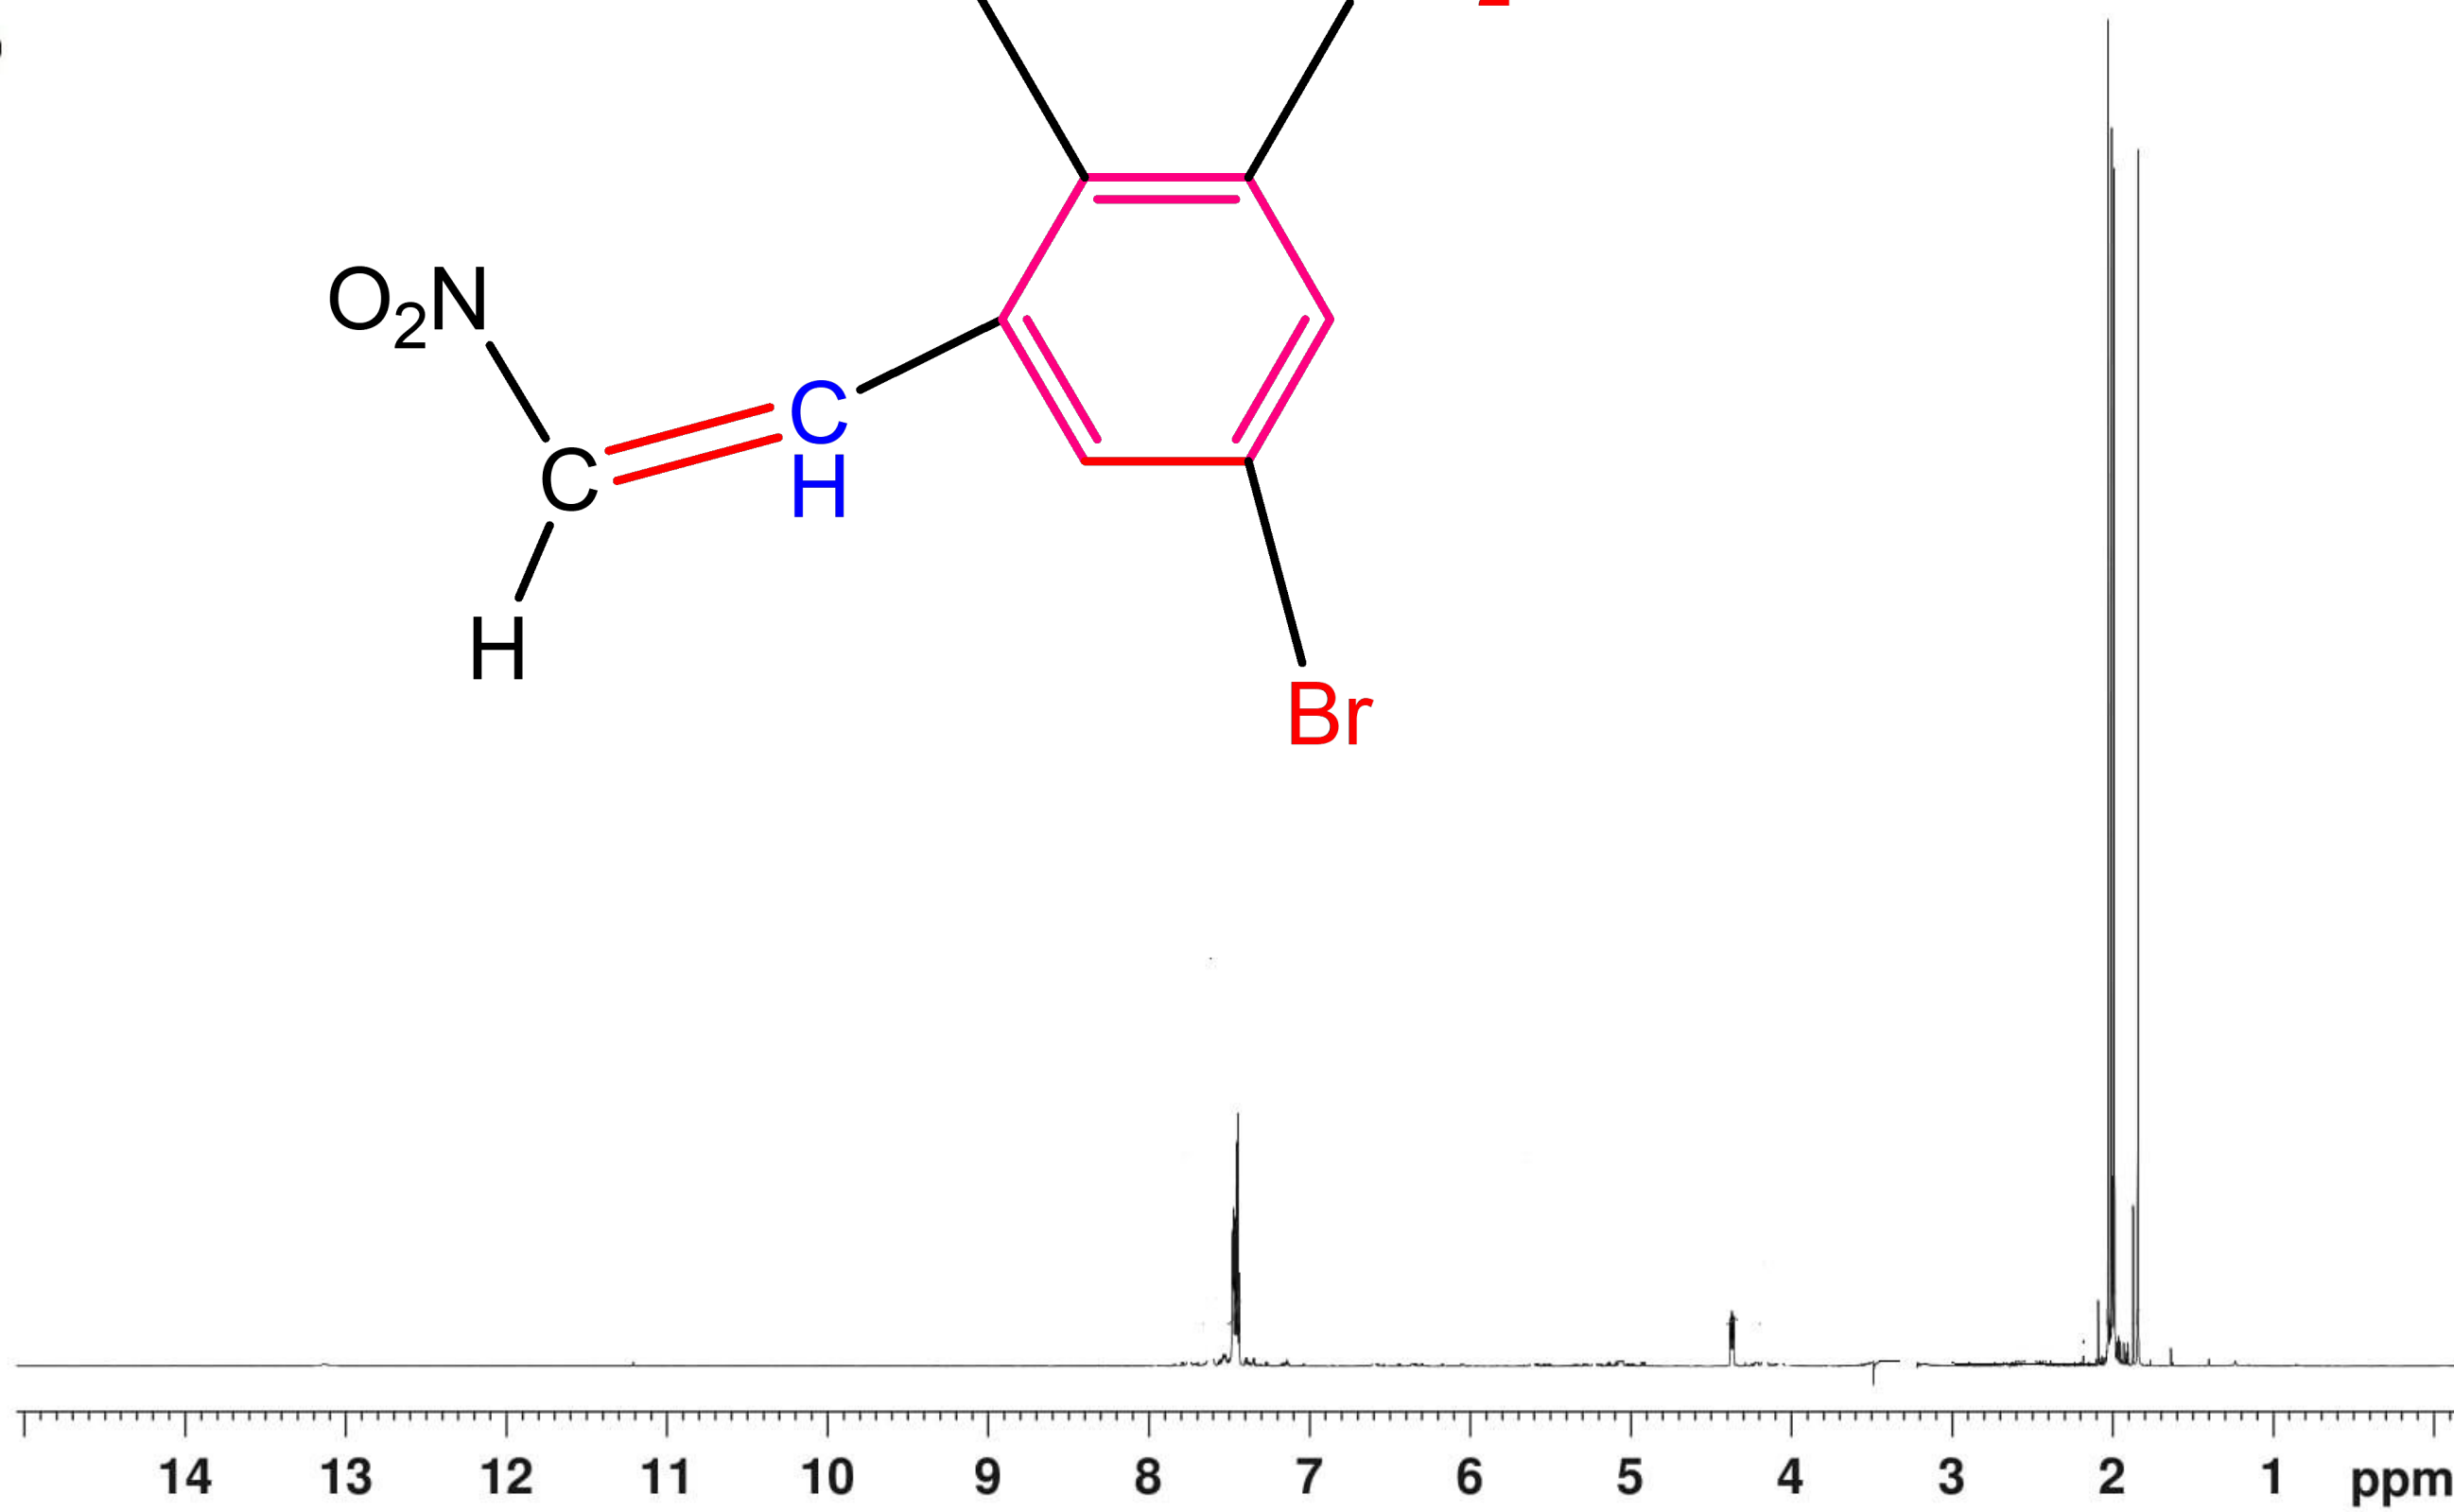

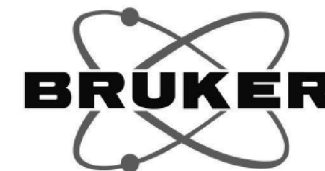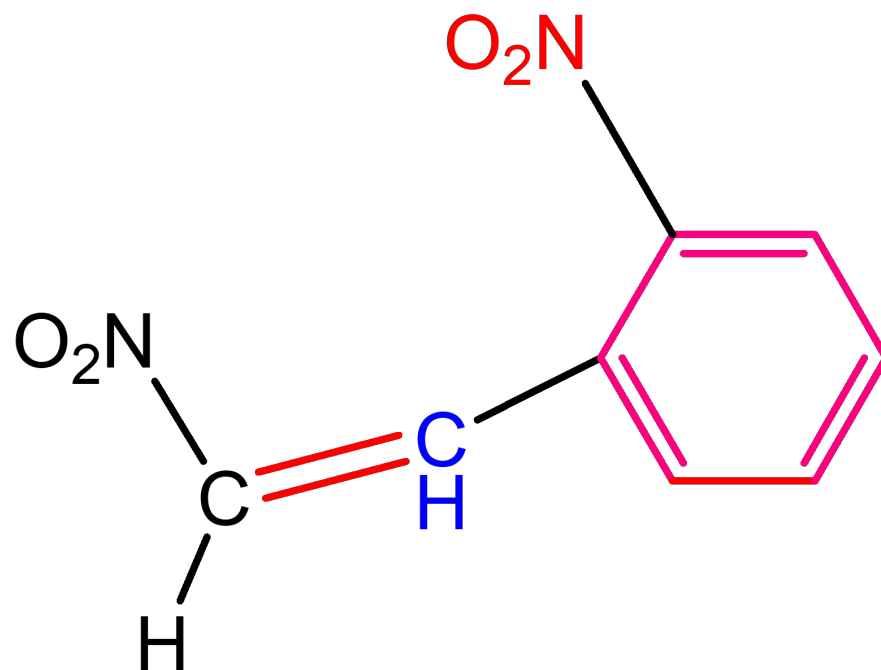

Current Data Parameters

NAME MAJDA D  
EXPNO 50  
PROCNO 1

F2 - Acquisition Parameters

Date\_   
Time 10.14  
INSTRUM spect  
PROBHD 5 mm CPQCI 1H-  
PULPROG zg30  
TD 65536  
SOLVENT DMSO  
NS 32  
DS 2  
SWH 17006.803 Hz  
FIDRES 0.259503 Hz  
AQ 1.9267584 sec  
RG 10.55  
DW 29.400 usec  
DE 10.00 usec  
TE 298.0 K  
D1 1.00000000 sec  
TD0 1

===== CHANNEL f1 =====  
SFO1 850.1552500 MHz  
NUC1 1H  
P1 8.00 usec  
PLW1 15.30000019 W

F2 - Processing parameters  
SI 65536  
SF 850.1500000 MHz  
WDW EM  
SSB 0  
LB 0.30 Hz  
GB 0  
PC 2.00

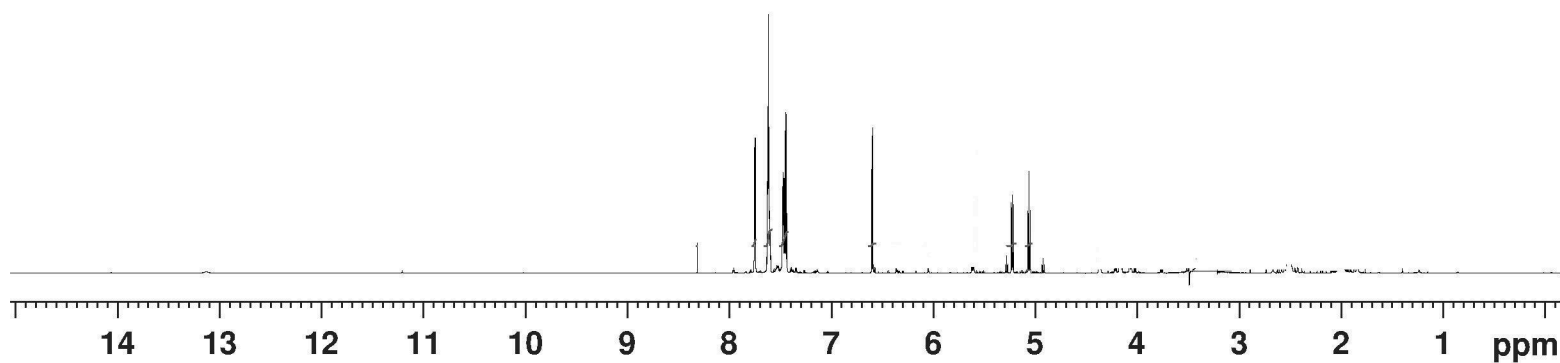

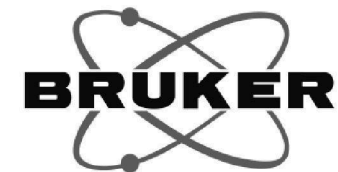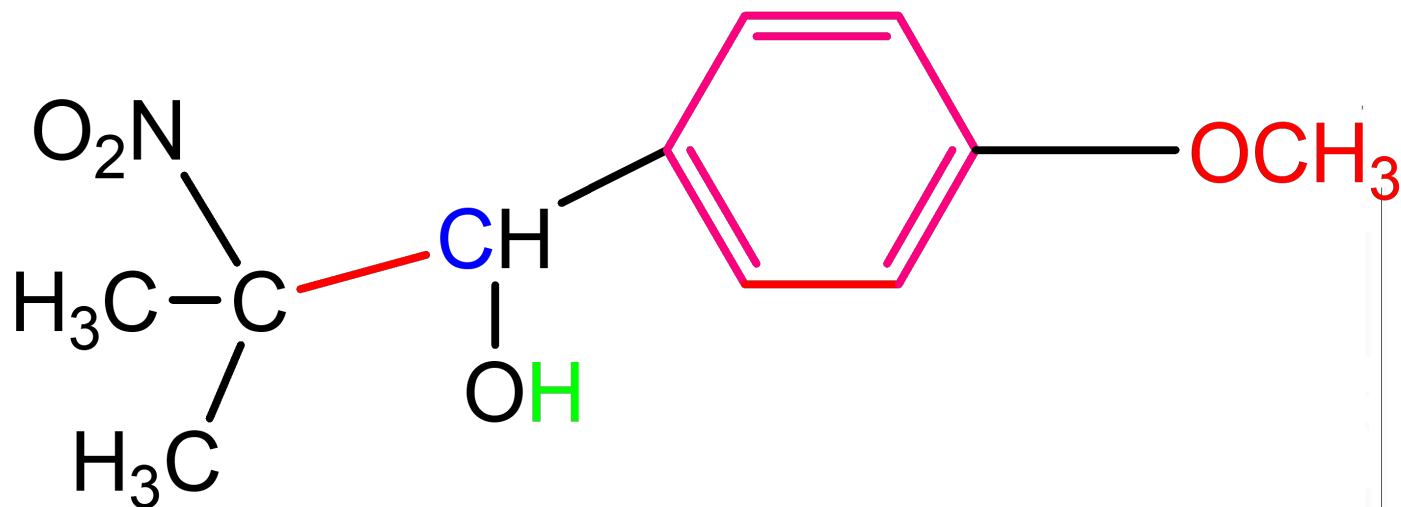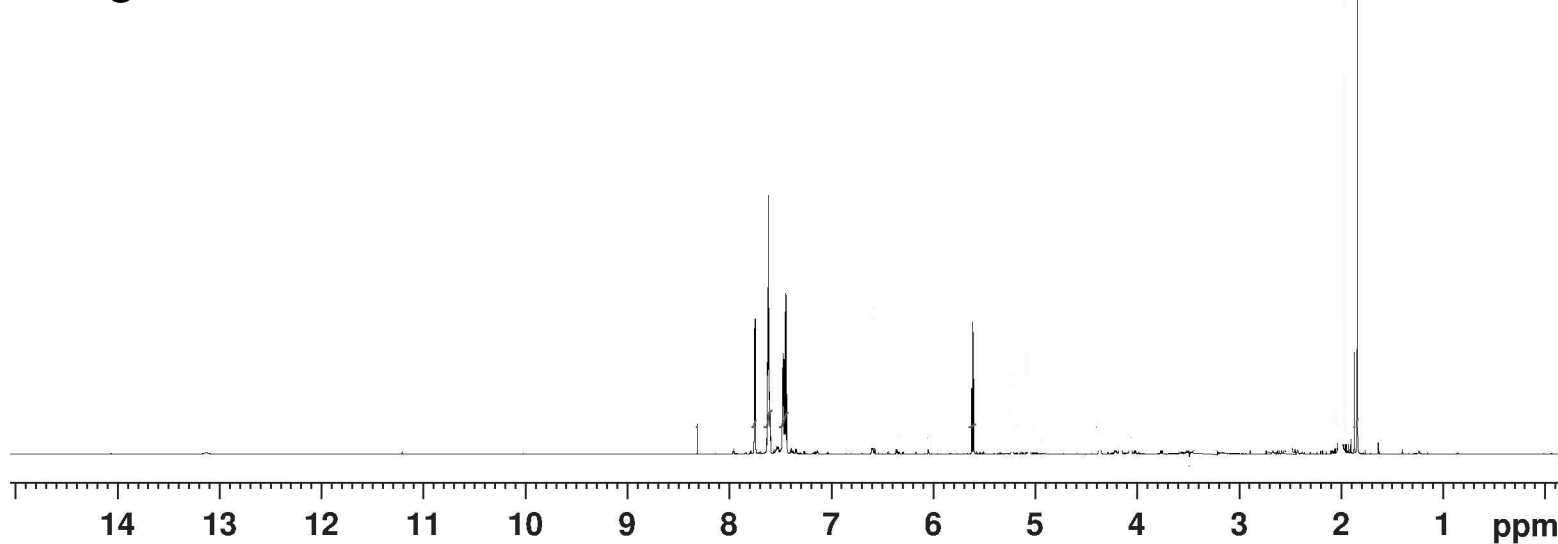

Current Data Parameters

NAME MAJDA E  
EXPNO 50  
PROCNO 1

F2 - Acquisition Parameters

Date\_   
Time 10.14  
INSTRUM spect  
PROBHD 5 mm CPQCI 1H-  
PULPROG zg30  
TD 65536  
SOLVENT DMSO  
NS 32  
DS 2  
SWH 17006.803 Hz  
FIDRES 0.259503 Hz  
AQ 1.9267584 sec  
RG 10.55  
DW 29.400 usec  
DE 10.00 usec  
TE 298.0 K  
D1 1.00000000 sec  
TD0 1

===== CHANNEL f1 =====  
SFO1 850.1552500 MHz  
NUC1 1H  
P1 8.00 usec  
PLW1 15.30000019 W

F2 - Processing parameters  
SI 65536  
SF 850.1500000 MHz  
WDW EM  
SSB 0  
LB 0.30 Hz  
GB 0  
PC 2.00

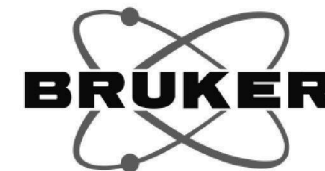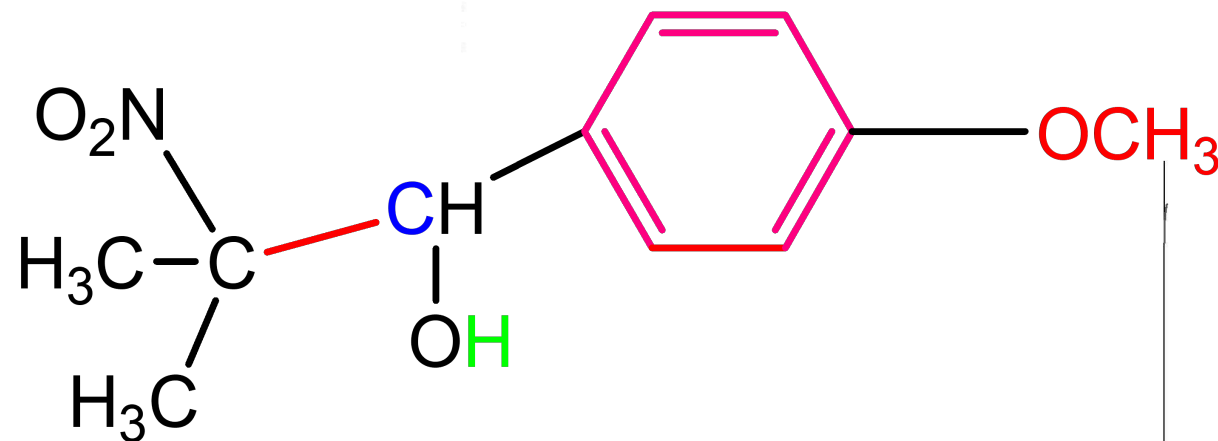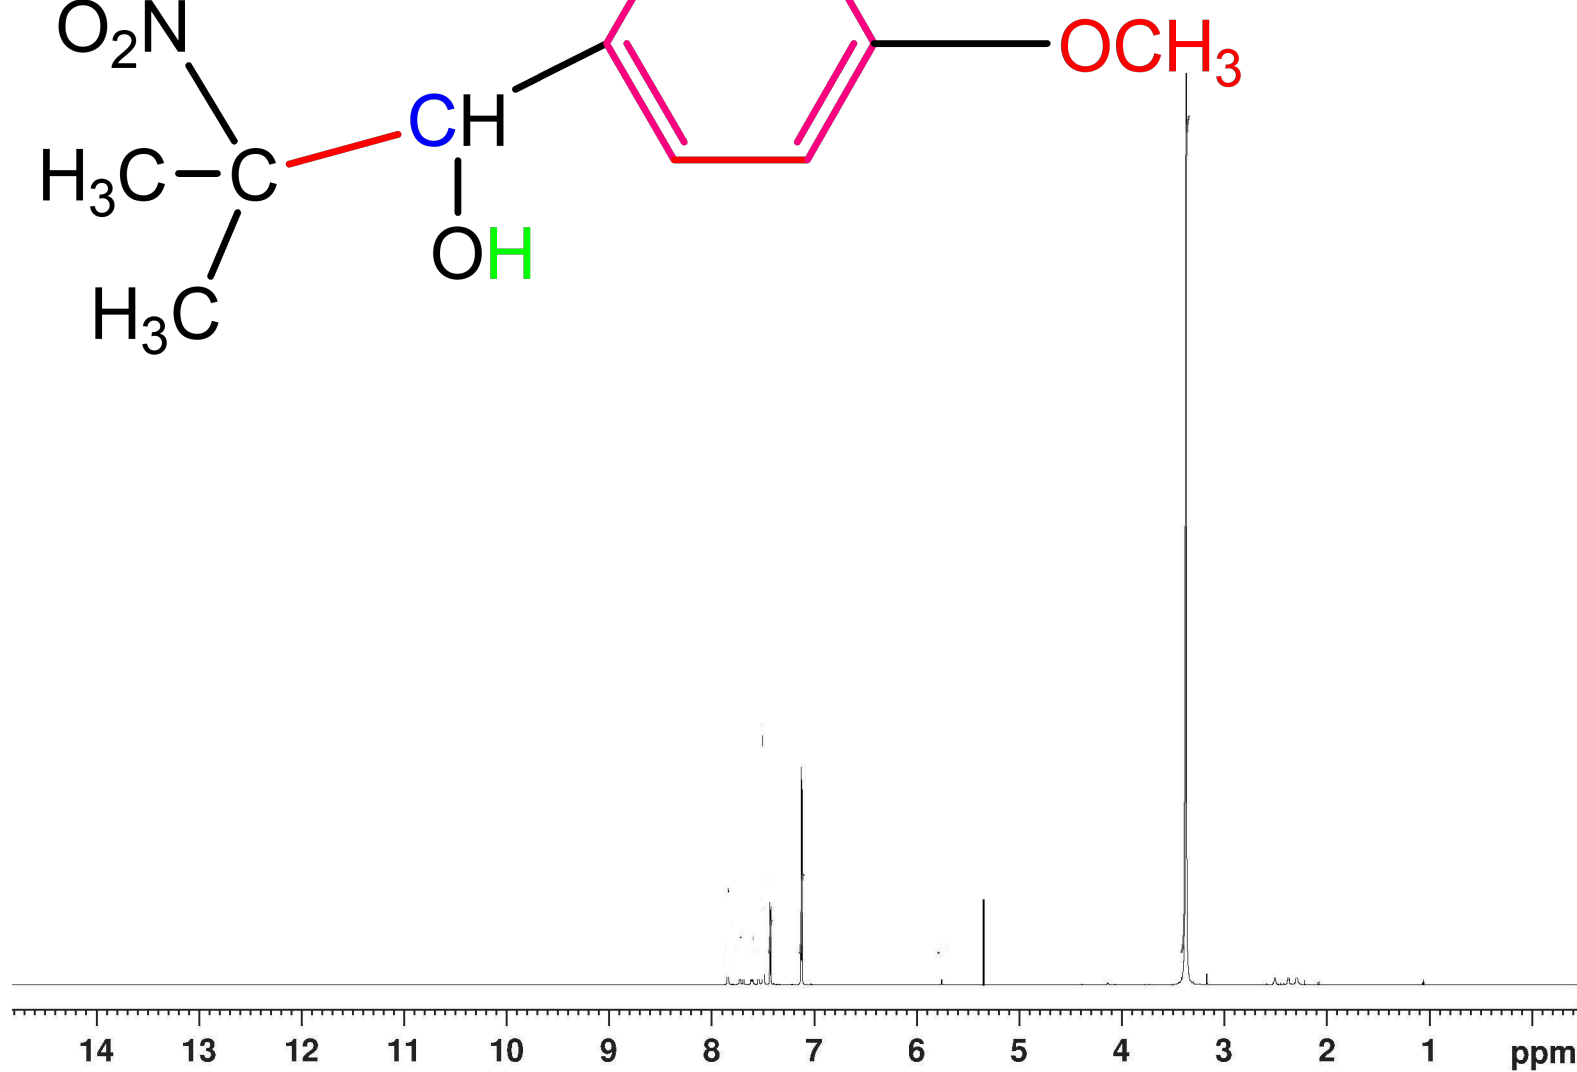

Current Data Parameters

NAME MAJDA F  
EXPNO 40  
PROCNO 1

F2 - Acquisition Parameters

Date\_ -  
Time 10.09  
INSTRUM spect  
PROBHD 5 mm CPQCI 1H-  
PULPROG zg30  
TD 65536  
SOLVENT DMSO  
NS 32  
DS 2  
SWH 17006.803 Hz  
FIDRES 0.259503 Hz  
AQ 1.9267584 sec  
RG 10.55  
DW 29.400 usec  
DE 10.00 usec  
TE 298.0 K  
D1 1.00000000 sec  
TD0 1

==== CHANNEL f1 =====  
SFO1 850.1552500 MHz  
NUC1 1H  
P1 8.00 usec  
PLW1 15.30000019 W

F2 - Processing parameters

SI 65536  
SF 850.1500000 MHz  
WDW EM  
SSE 0  
LB 0.30 Hz  
GB 0  
PC 2.00
